# Supplementary material
Source: PubMed Central journal article supplement (PMC6064042)
Supplement: NIHMS1500715-supplement-PMBaacd22_supplementarymaterial_pdf.pdf [file NIHMS1500715-supplement-PMBaacd22_supplementarymaterial_pdf.pdf]

# Supplemental

**Supplemental Table 1. TRE, ICE and DSC for each registration. (Mean±Standard Deviation)**

| Registration | TRE (mm)  |           |           |           | ICE (mm)  | DSC       |
|--------------|-----------|-----------|-----------|-----------|-----------|-----------|
|              | LR        | AP        | SI        | 3D        |           |           |
| BSpline SSD  | 1.63±0.68 | 1.59±0.56 | 3.05±0.79 | 4.30±1.09 | 2.77±1.33 | 0.66±0.11 |
| BSpline MI   | 1.71±0.69 | 2.05±1.19 | 3.20±1.44 | 4.75±1.88 | 3.04±1.95 | 0.65±0.12 |
| Demons       | 1.71±0.72 | 2.08±1.08 | 3.82±1.62 | 5.28±1.94 | 1.48±0.49 | 0.65±0.13 |

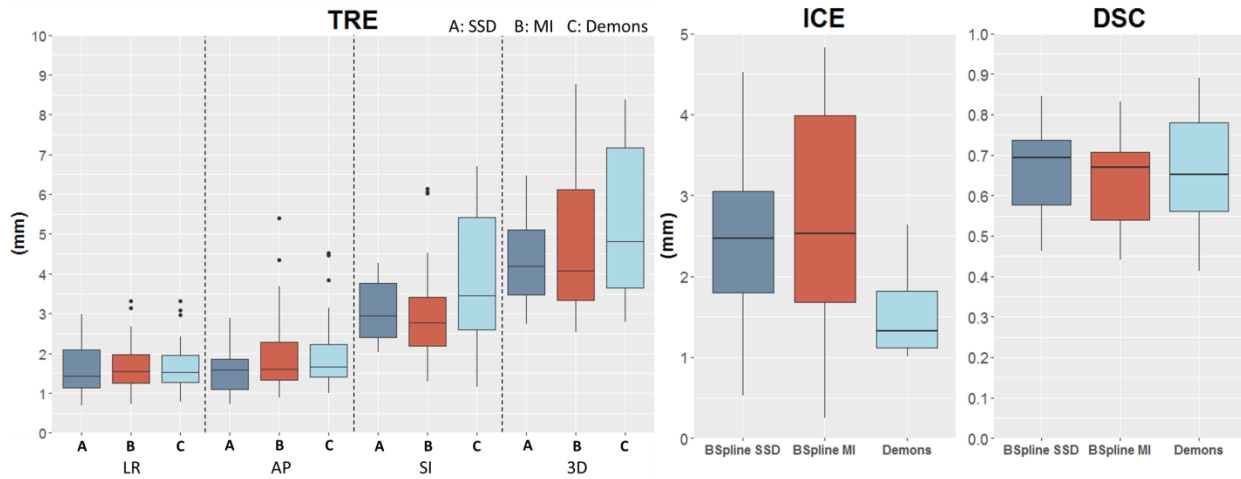

**Supplemental Figure 1. Box plots of TRE, ICE and DSC for each registration method.**

**Supplemental Table 2. Spearman correlation and average percentage difference between tumor volume change calculated by Jacobian integral and manual segmentation.**

| Registration | Spearman Correlation $\rho$ | Percentage difference |
|--------------|-----------------------------|-----------------------|
| BSpline SSD  | 0.63                        | 24%                   |
| BSpline MI   | 0.61                        | 24%                   |
| Demons       | 0.69                        | 27%                   |

**Supplemental Table 3. The intra-class correlation coefficient (ICC) among the eroded/dilated contours and the original contours.**

| Feature          | ICC  | P-value |
|------------------|------|---------|
| Median Jacobian  | 0.98 | 1.0E-29 |
| Minimum Jacobian | 0.95 | 2.0E-22 |

Supplemental Table 4. Comparison between the predictions by the SVM-LASSO model using Jacobian features from the original contour and 2 mm dilated/eroded contours.

| Contour  | Sensitivity (%) | Specificity (%) | Accuracy (%) | AUC  |
|----------|-----------------|-----------------|--------------|------|
| Original | 94.4%           | 91.8%           | 94.0%        | 0.94 |
| Dilated  | 100%            | 90.9%           | 95.0%        | 0.93 |
| Eroded   | 88.8%           | 90.9%           | 90.0%        | 0.92 |

### Dilated Contour

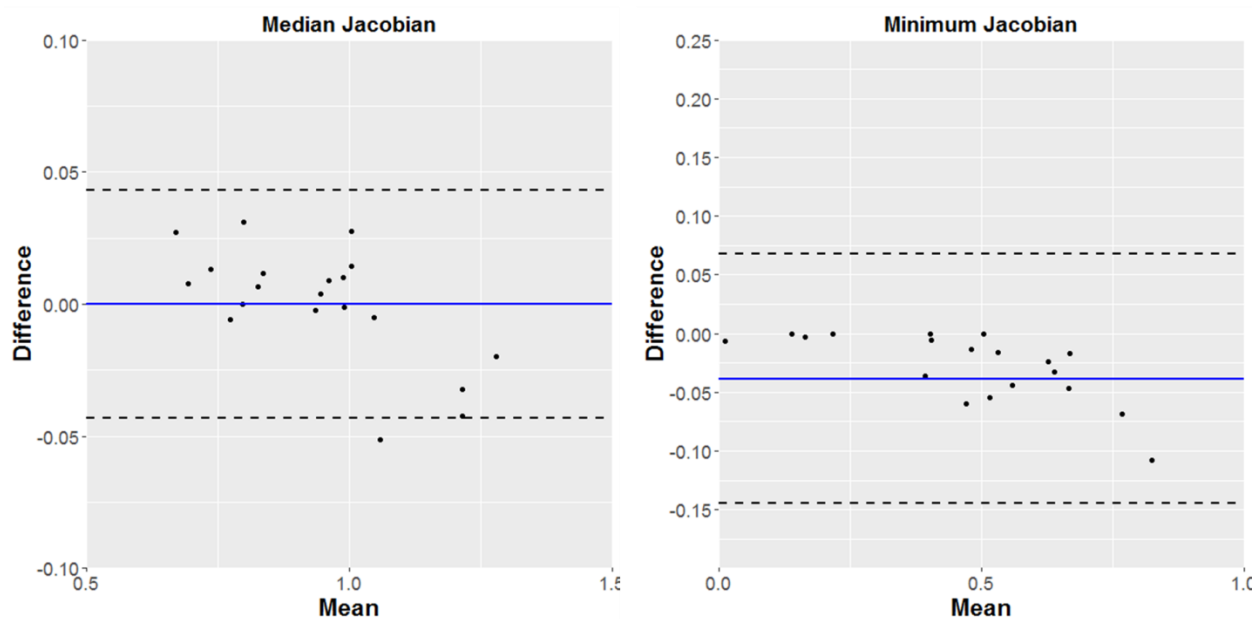

## Eroded Contour

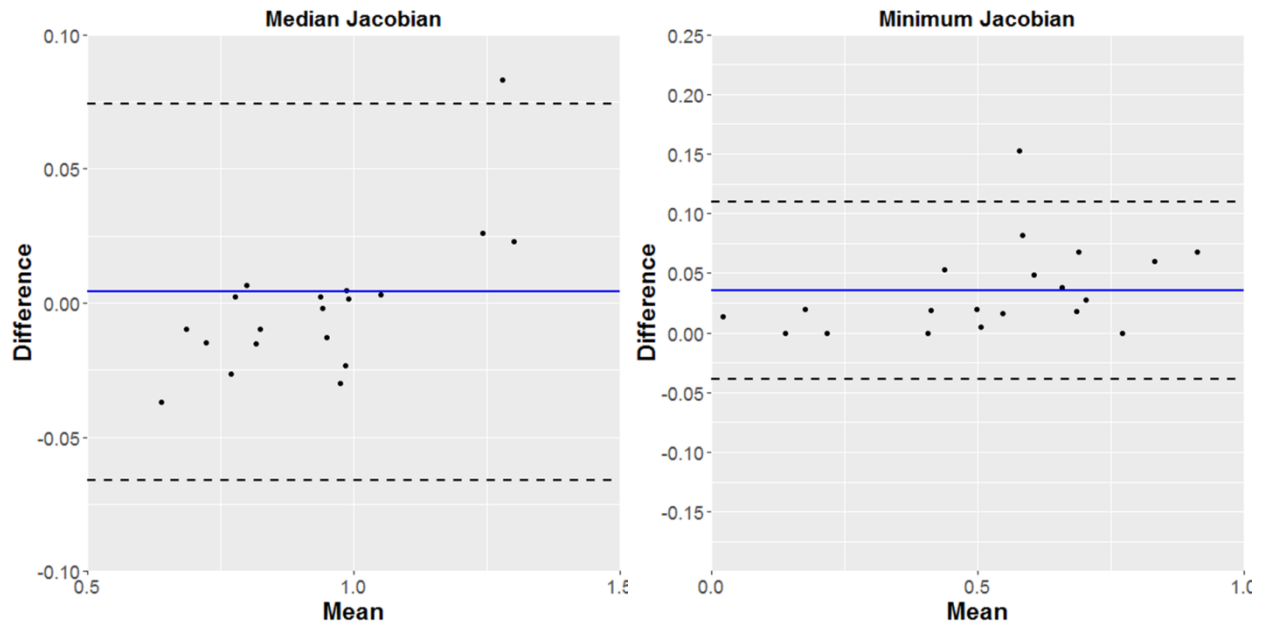

Supplemental Figure 2. Bland-Altman plots for the two selected features between the original contour and the dilated/eroded contours; Blue line is average difference and dashed lines are 95% limits of agreement.

**Supplemental Table 5. List of radiomic features extracted from baseline and follow-up PET/CT, their changes and Jacobian map. GLCM=Gray Level Co-occurrence Matrix. GRLM=Gray Level Run Length Matrix. \*2D was also extracted.**

| Feature Name                     | Feature Type    | Texture Type | Images            |
|----------------------------------|-----------------|--------------|-------------------|
| Tumor Volume*                    | Shape           |              | CT, PET, Jacobian |
| Bounding Box Volume              | Shape           |              | CT, PET, Jacobian |
| Bounding Box Size1               | Shape           |              | CT, PET, Jacobian |
| Bounding Box Size2               | Shape           |              | CT, PET, Jacobian |
| Bounding Box Size 3              | Shape           |              | CT, PET, Jacobian |
| Oriented Bounding Box Volume     | Shape           |              | CT, PET, Jacobian |
| Oriented Bounding Box Size 1     | Shape           |              | CT, PET, Jacobian |
| Oriented Bounding Box Size 2     | Shape           |              | CT, PET, Jacobian |
| Oriented Bounding Box Size 3     | Shape           |              | CT, PET, Jacobian |
| Equivalent Ellipsoid Diameter 1* | Shape           |              | CT, PET, Jacobian |
| Equivalent Ellipsoid Diameter 2* | Shape           |              | CT, PET, Jacobian |
| Equivalent Ellipsoid Diameter 3  | Shape           |              | CT, PET, Jacobian |
| Equivalent Spherical Perimeter*  | Shape           |              | CT, PET, Jacobian |
| Equivalent Spherical Radius*     | Shape           |              | CT, PET, Jacobian |
| Feret Diameter*                  | Shape           |              | CT, PET, Jacobian |
| Number Of Lines*                 | Shape           |              | CT, PET, Jacobian |
| Number Of Pixels*                | Shape           |              | CT, PET, Jacobian |
| Perimeter*                       | Shape           |              | CT, PET, Jacobian |
| Eccentricity                     | Shape           |              | CT, PET, Jacobian |
| Elongation*                      | Shape           |              | CT, PET, Jacobian |
| Flatness*                        | Shape           |              | CT, PET, Jacobian |
| Orientation                      | Shape           |              | CT, PET, Jacobian |
| Roundness*                       | Shape           |              | CT, PET, Jacobian |
| Weighted Elongation*             | Shape-Intensity |              | CT, PET, Jacobian |
| Weighted Flatness*               | Shape-Intensity |              | CT, PET, Jacobian |
| Median*                          | Intensity       |              | CT, PET, Jacobian |
| Minimum*                         | Intensity       |              | CT, PET, Jacobian |
| Kurtosis*                        | Intensity       |              | CT, PET, Jacobian |
| Maximum*                         | Intensity       |              | CT, PET, Jacobian |
| Mean*                            | Intensity       |              | CT, PET, Jacobian |
| Skewness*                        | Intensity       |              | CT, PET, Jacobian |
| Standard Deviation*              | Intensity       |              | CT, PET, Jacobian |
| Sum*                             | Intensity       |              | CT, PET, Jacobian |
| Variance*                        | Intensity       |              | CT, PET, Jacobian |
| Mean Of Energy                   | Texture         | GLCM         | CT, PET, Jacobian |

|                                                          |           |      |                   |
|----------------------------------------------------------|-----------|------|-------------------|
| Mean Of Entropy                                          | Texture   | GLCM | CT, PET, Jacobian |
| Mean Of Correlation                                      | Texture   | GLCM | CT, PET, Jacobian |
| Mean Of Inverse Difference Moment                        | Texture   | GLCM | CT, PET, Jacobian |
| Mean Of Inertia                                          | Texture   | GLCM | CT, PET, Jacobian |
| Mean Of Cluster Shade                                    | Texture   | GLCM | CT, PET, Jacobian |
| Mean Of Cluster Prominence                               | Texture   | GLCM | CT, PET, Jacobian |
| Mean Of Haralick Correlation                             | Texture   | GLCM | CT, PET, Jacobian |
| Standard Deviation Of Energy                             | Texture   | GLCM | CT, PET, Jacobian |
| Standard Deviation Of Entropy                            | Texture   | GLCM | CT, PET, Jacobian |
| Standard Deviation Of Correlation                        | Texture   | GLCM | CT, PET, Jacobian |
| Standard Deviation Of Inverse Difference Moment          | Texture   | GLCM | CT, PET, Jacobian |
| Standard Deviation Of Inertia                            | Texture   | GLCM | CT, PET, Jacobian |
| Standard Deviation Of Cluster Shade                      | Texture   | GLCM | CT, PET, Jacobian |
| Standard Deviation Of Cluster Prominence                 | Texture   | GLCM | CT, PET, Jacobian |
| Standard Deviation Of Haralick Correlation               | Texture   | GLCM | CT, PET, Jacobian |
| Mean Of Short Run Emphasis                               | Texture   | GLRM | CT, PET, Jacobian |
| Mean Of Long Run Emphasis                                | Texture   | GLRM | CT, PET, Jacobian |
| Mean Of Grey Level Non-uniformity                        | Texture   | GLRM | CT, PET, Jacobian |
| Mean Of Run Length Non-uniformity                        | Texture   | GLRM | CT, PET, Jacobian |
| Mean Of Low Grey Level Run Emphasis                      | Texture   | GLRM | CT, PET, Jacobian |
| Mean Of High Grey Level Run Emphasis                     | Texture   | GLRM | CT, PET, Jacobian |
| Mean Of Short Run Low Grey Level Emphasis                | Texture   | GLRM | CT, PET, Jacobian |
| Mean Of Short Run High Grey Level Emphasis               | Texture   | GLRM | CT, PET, Jacobian |
| Mean Of Long Run Low Grey Level Emphasis                 | Texture   | GLRM | CT, PET, Jacobian |
| Mean Of Long Run High Grey Level Emphasis                | Texture   | GLRM | CT, PET, Jacobian |
| Standard Deviation Of Short Run Emphasis                 | Texture   | GLRM | CT, PET, Jacobian |
| Standard Deviation Of Long Run Emphasis                  | Texture   | GLRM | CT, PET, Jacobian |
| Standard Deviation Of Grey Level Non-uniformity          | Texture   | GLRM | CT, PET, Jacobian |
| Standard Deviation Of Run Length Non-uniformity          | Texture   | GLRM | CT, PET, Jacobian |
| Standard Deviation Of Low Grey Level Run Emphasis        | Texture   | GLRM | CT, PET, Jacobian |
| Standard Deviation Of High Grey Level Run Emphasis       | Texture   | GLRM | CT, PET, Jacobian |
| Standard Deviation Of Short Run Low Grey Level Emphasis  | Texture   | GLRM | CT, PET, Jacobian |
| Standard Deviation Of Short Run High Grey Level Emphasis | Texture   | GLRM | CT, PET, Jacobian |
| Standard Deviation Of Long Run Low Grey Level Emphasis   | Texture   | GLRM | CT, PET, Jacobian |
| Standard Deviation Of Long Run High Grey Level Emphasis  | Texture   | GLRM | CT, PET, Jacobian |
| Total Lesion Glycolysis                                  | Metabolic |      | PET               |
| Jacobian Integral                                        | Jacobian  |      | Jacobian          |
| Shrinking Percentage                                     | Jacobian  |      | Jacobian          |
| Expansion Percentage                                     | Jacobian  |      | Jacobian          |
